# Supplementary material for: Duration of Dual Antiplatelet Therapy After Percutaneous Coronary Intervention in Patients With Type 2 Diabetes Mellitus: A Systematic Review and Network Meta-analysis
Source: PubMed Central journal article supplement — J Soc Cardiovasc Angiogr Interv. 2024 Mar 22;3(7):101859. doi: 10.1016/j.jscai.2024.101859 (PMC11307649; doi:10.1016/j.jscai.2024.101859), 2024-03-22

## Supplementary Material

### Comparison of Different Durations of Dual Antiplatelet Therapy after Percutaneous Coronary Intervention in Patients with Type 2 Diabetes Mellitus: A Systematic Review and Network Meta-analysis

Dae Yong Park\*, MD<sup>a</sup>; Jiun-Ruey Hu\*, MPH, MD<sup>b</sup>, Greta Campbell<sup>c</sup>, Kiara Goldwag, MSN<sup>b</sup>;  
Michelle D. Kelsey, MD<sup>d</sup>; S. Elissa Altin, MD<sup>b</sup>, Cesia Gallegos-Kattán, MD, MHS<sup>b</sup>,  
Michael G. Nanna, MD, MHS<sup>b</sup>

\*These two authors equally contributed to this study.

<sup>a</sup> Department of Medicine, Cook County Health, Chicago, IL, USA

<sup>b</sup> Section of Cardiovascular Medicine, Yale School of Medicine, New Haven, CT, USA

<sup>c</sup> Department of Cardiovascular Medicine, Brigham and Women's Hospital, Boston, MA, USA

<sup>d</sup> Department of Medicine, Division of Cardiology, Duke University, Durham, NC, USA

**Email of correspondence author:** [michael.nanna@yale.edu](mailto:michael.nanna@yale.edu)

Supplemental Table S1. PRISMA 2020 checklist

| Topic                          | No. | Item                                                                                                                                                                                                                                                                                                 | Location where item is reported |
|--------------------------------|-----|------------------------------------------------------------------------------------------------------------------------------------------------------------------------------------------------------------------------------------------------------------------------------------------------------|---------------------------------|
| <b>TITLE</b>                   |     |                                                                                                                                                                                                                                                                                                      |                                 |
| <b>Title</b>                   | 1   | Identify the report as a systematic review.                                                                                                                                                                                                                                                          | LN 1-3                          |
| <b>ABSTRACT</b>                |     |                                                                                                                                                                                                                                                                                                      |                                 |
| <b>Abstract</b>                | 2   | See the PRISMA 2020 for Abstracts checklist                                                                                                                                                                                                                                                          | Table S1                        |
| <b>INTRODUCTION</b>            |     |                                                                                                                                                                                                                                                                                                      |                                 |
| <b>Rationale</b>               | 3   | Describe the rationale for the review in the context of existing knowledge.                                                                                                                                                                                                                          | LN 68-83                        |
| <b>Objectives</b>              | 4   | Provide an explicit statement of the objective(s) or question(s) the review addresses.                                                                                                                                                                                                               | LN 84-87                        |
| <b>METHODS</b>                 |     |                                                                                                                                                                                                                                                                                                      |                                 |
| <b>Eligibility criteria</b>    | 5   | Specify the inclusion and exclusion criteria for the review and how studies were grouped for the syntheses.                                                                                                                                                                                          | LN 97-118                       |
| <b>Information sources</b>     | 6   | Specify all databases, registers, websites, organisations, reference lists and other sources searched or consulted to identify studies. Specify the date when each source was last searched or consulted.                                                                                            | LN 98-99                        |
| <b>Search strategy</b>         | 7   | Present the full search strategies for all databases, registers and websites, including any filters and limits used.                                                                                                                                                                                 | Table S2                        |
| <b>Selection process</b>       | 8   | Specify the methods used to decide whether a study met the inclusion criteria of the review, including how many reviewers screened each record and each report retrieved, whether they worked independently, and if applicable, details of automation tools used in the process.                     | LN 113-118                      |
| <b>Data collection process</b> | 9   | Specify the methods used to collect data from reports, including how many reviewers collected data from each report, whether they worked independently, any processes for obtaining or confirming data from study investigators, and if applicable, details of automation tools used in the process. | LN 121-126                      |
| <b>Data items</b>              | 10a | List and define all outcomes for which data were sought. Specify whether all results that were compatible with each outcome domain in each study were sought (e.g. for all measures, time points, analyses), and if not, the methods used to decide which results to collect.                        | LN 121-126                      |

| Topic                                | No. | Item                                                                                                                                                                                                                                                              | Location where item is reported |
|--------------------------------------|-----|-------------------------------------------------------------------------------------------------------------------------------------------------------------------------------------------------------------------------------------------------------------------|---------------------------------|
| <b>Study risk of bias assessment</b> | 10b | List and define all other variables for which data were sought (e.g. participant and intervention characteristics, funding sources). Describe any assumptions made about any missing or unclear information.                                                      | LN 121-126                      |
|                                      | 11  | Specify the methods used to assess risk of bias in the included studies, including details of the tool(s) used, how many reviewers assessed each study and whether they worked independently, and if applicable, details of automation tools used in the process. | LN 117-118                      |
| <b>Effect measures</b>               | 12  | Specify for each outcome the effect measure(s) (e.g. risk ratio, mean difference) used in the synthesis or presentation of results.                                                                                                                               | LN 124-126                      |
| <b>Synthesis methods</b>             | 13a | Describe the processes used to decide which studies were eligible for each synthesis (e.g. tabulating the study intervention characteristics and comparing against the planned groups for each synthesis (item 5)).                                               | LN 129-138                      |
|                                      | 13b | Describe any methods required to prepare the data for presentation or synthesis, such as handling of missing summary statistics, or data conversions.                                                                                                             | LN 129-132                      |
|                                      | 13c | Describe any methods used to tabulate or visually display results of individual studies and syntheses.                                                                                                                                                            | LN 131-139                      |
|                                      | 13d | Describe any methods used to synthesize results and provide a rationale for the choice(s). If meta-analysis was performed, describe the model(s), method(s) to identify the presence and extent of statistical heterogeneity, and software package(s) used.       | LN 129-148                      |
|                                      | 13e | Describe any methods used to explore possible causes of heterogeneity among study results (e.g. subgroup analysis, meta-regression).                                                                                                                              | LN 134-135                      |
|                                      | 13f | Describe any sensitivity analyses conducted to assess robustness of the synthesized results.                                                                                                                                                                      | LN 139-146                      |
| <b>Reporting bias assessment</b>     | 14  | Describe any methods used to assess risk of bias due to missing results in a synthesis (arising from reporting biases).                                                                                                                                           | LN 117-118                      |
| <b>Certainty assessment</b>          | 15  | Describe any methods used to assess certainty (or confidence) in the body of evidence for an outcome.                                                                                                                                                             | LN 117-118                      |
| <b>RESULTS</b>                       |     |                                                                                                                                                                                                                                                                   |                                 |
| <b>Study selection</b>               | 16a | Describe the results of the search and selection process, from the number of records identified in the search to the number of studies included in the review, ideally using a flow diagram.                                                                      | LN 151-152, Figure 1            |
|                                      | 16b | Cite studies that might appear to meet the inclusion criteria, but which were excluded, and explain why they were excluded.                                                                                                                                       | Figure 1                        |
| <b>Study characteristics</b>         | 17  | Cite each included study and present its characteristics.                                                                                                                                                                                                         | Table 1, Table S3               |
| <b>Risk of bias in studies</b>       | 18  | Present assessments of risk of bias for each included study.                                                                                                                                                                                                      | Table S5                        |

| Topic                                | No. | Item                                                                                                                                                                                                                                                                                 | Location where item is reported |
|--------------------------------------|-----|--------------------------------------------------------------------------------------------------------------------------------------------------------------------------------------------------------------------------------------------------------------------------------------|---------------------------------|
| <b>Results of individual studies</b> | 19  | For all outcomes, present, for each study: (a) summary statistics for each group (where appropriate) and (b) an effect estimate and its precision (e.g. confidence/credible interval), ideally using structured tables or plots.                                                     | Table 2                         |
| <b>Results of syntheses</b>          | 20a | For each synthesis, briefly summarise the characteristics and risk of bias among contributing studies.                                                                                                                                                                               | Table 1, Table S5               |
|                                      | 20b | Present results of all statistical syntheses conducted. If meta-analysis was done, present for each the summary estimate and its precision (e.g. confidence/credible interval) and measures of statistical heterogeneity. If comparing groups, describe the direction of the effect. | LN 179-193                      |
|                                      | 20c | Present results of all investigations of possible causes of heterogeneity among study results.                                                                                                                                                                                       | LN 174-178, Table S7            |
|                                      | 20d | Present results of all sensitivity analyses conducted to assess the robustness of the synthesized results.                                                                                                                                                                           | LN 194-201, Table S9-S11        |
| <b>Reporting biases</b>              | 21  | Present assessments of risk of bias due to missing results (arising from reporting biases) for each synthesis assessed.                                                                                                                                                              | Table S5                        |
| <b>Certainty of evidence</b>         | 22  | Present assessments of certainty (or confidence) in the body of evidence for each outcome assessed.                                                                                                                                                                                  | LN 173-174, Table S6            |
| <b>DISCUSSION</b>                    |     |                                                                                                                                                                                                                                                                                      |                                 |
| <b>Discussion</b>                    | 23a | Provide a general interpretation of the results in the context of other evidence.                                                                                                                                                                                                    | LN 204-217                      |
|                                      | 23b | Discuss any limitations of the evidence included in the review.                                                                                                                                                                                                                      | LN 283-300                      |
|                                      | 23c | Discuss any limitations of the review processes used.                                                                                                                                                                                                                                | LN 283-300                      |
|                                      | 23d | Discuss implications of the results for practice, policy, and future research.                                                                                                                                                                                                       | LN 301-307                      |
| <b>OTHER INFORMATION</b>             |     |                                                                                                                                                                                                                                                                                      |                                 |
| <b>Registration and protocol</b>     | 24a | Provide registration information for the review, including register name and registration number, or state that the review was not registered.                                                                                                                                       | LN 91                           |
|                                      | 24b | Indicate where the review protocol can be accessed, or state that a protocol was not prepared.                                                                                                                                                                                       | LN 91                           |
|                                      | 24c | Describe and explain any amendments to information provided at registration or in the protocol.                                                                                                                                                                                      | N/A                             |
| <b>Support</b>                       | 25  | Describe sources of financial or non-financial support for the review, and the role of the funders or sponsors in the review.                                                                                                                                                        | LN 314                          |
| <b>Competing interests</b>           | 26  | Declare any competing interests of review authors.                                                                                                                                                                                                                                   | LN 22-33                        |

| Topic                                                 | No. | Item                                                                                                                                                                                                                                       | Location where item is reported |
|-------------------------------------------------------|-----|--------------------------------------------------------------------------------------------------------------------------------------------------------------------------------------------------------------------------------------------|---------------------------------|
| <b>Availability of data, code and other materials</b> | 27  | Report which of the following are publicly available and where they can be found: template data collection forms; data extracted from included studies; data used for all analyses; analytic code; any other materials used in the review. | LN 317                          |

From: Page MJ, McKenzie JE, Bossuyt PM, Boutron I, Hoffmann TC, Mulrow CD, et al. The PRISMA 2020 statement: an updated guideline for reporting systematic reviews. *MetaArXiv*. 2020, September 14. DOI: 10.31222/osf.io/v7gm2. For more information, visit: [www.prisma-statement.org](http://www.prisma-statement.org)<sup>8</sup>

### PRISMA Abstract Checklist

| Topic                          | No. | Item                                                                                                                                                                                                                                                                                                  | Reported? |
|--------------------------------|-----|-------------------------------------------------------------------------------------------------------------------------------------------------------------------------------------------------------------------------------------------------------------------------------------------------------|-----------|
| <b>TITLE</b>                   |     |                                                                                                                                                                                                                                                                                                       |           |
| <b>Title</b>                   | 1   | Identify the report as a systematic review.                                                                                                                                                                                                                                                           | Yes       |
| <b>BACKGROUND</b>              |     |                                                                                                                                                                                                                                                                                                       |           |
| <b>Objectives</b>              | 2   | Provide an explicit statement of the main objective(s) or question(s) the review addresses.                                                                                                                                                                                                           | Yes       |
| <b>METHODS</b>                 |     |                                                                                                                                                                                                                                                                                                       |           |
| <b>Eligibility criteria</b>    | 3   | Specify the inclusion and exclusion criteria for the review.                                                                                                                                                                                                                                          | Yes       |
| <b>Information sources</b>     | 4   | Specify the information sources (e.g. databases, registers) used to identify studies and the date when each was last searched.                                                                                                                                                                        | Yes       |
| <b>Risk of bias</b>            | 5   | Specify the methods used to assess risk of bias in the included studies.                                                                                                                                                                                                                              | Yes       |
| <b>Synthesis of results</b>    | 6   | Specify the methods used to present and synthesize results.                                                                                                                                                                                                                                           | Yes       |
| <b>RESULTS</b>                 |     |                                                                                                                                                                                                                                                                                                       |           |
| <b>Included studies</b>        | 7   | Give the total number of included studies and participants and summarise relevant characteristics of studies.                                                                                                                                                                                         | Yes       |
| <b>Synthesis of results</b>    | 8   | Present results for main outcomes, preferably indicating the number of included studies and participants for each. If meta-analysis was done, report the summary estimate and confidence/credible interval. If comparing groups, indicate the direction of the effect (i.e. which group is favoured). | Yes       |
| <b>DISCUSSION</b>              |     |                                                                                                                                                                                                                                                                                                       |           |
| <b>Limitations of evidence</b> | 9   | Provide a brief summary of the limitations of the evidence included in the review (e.g. study risk of bias, inconsistency and imprecision).                                                                                                                                                           | Yes       |
| <b>Interpretation</b>          | 10  | Provide a general interpretation of the results and important implications.                                                                                                                                                                                                                           | Yes       |
| <b>OTHER</b>                   |     |                                                                                                                                                                                                                                                                                                       |           |

| Topic               | No. | Item                                                  | Reported? |
|---------------------|-----|-------------------------------------------------------|-----------|
| <b>Funding</b>      | 11  | Specify the primary source of funding for the review. | Yes       |
| <b>Registration</b> | 12  | Provide the register name and registration number.    | Yes       |

Supplemental Table S2. Search strategy used in this study

| Database                | Search Strategy                                                                                                                                                                                                                                                                                                                                                                                                                                                                                                                                                                                                                                                                                                                                                                                                                                                                                                                                                                                                                                                                                                                                                                                                                                                                                                                                                                                                                                                                                                                                                                                                                                                                                                                                                                                                                                                                                                                                                                                                                                                                                                                                                   |
|-------------------------|-------------------------------------------------------------------------------------------------------------------------------------------------------------------------------------------------------------------------------------------------------------------------------------------------------------------------------------------------------------------------------------------------------------------------------------------------------------------------------------------------------------------------------------------------------------------------------------------------------------------------------------------------------------------------------------------------------------------------------------------------------------------------------------------------------------------------------------------------------------------------------------------------------------------------------------------------------------------------------------------------------------------------------------------------------------------------------------------------------------------------------------------------------------------------------------------------------------------------------------------------------------------------------------------------------------------------------------------------------------------------------------------------------------------------------------------------------------------------------------------------------------------------------------------------------------------------------------------------------------------------------------------------------------------------------------------------------------------------------------------------------------------------------------------------------------------------------------------------------------------------------------------------------------------------------------------------------------------------------------------------------------------------------------------------------------------------------------------------------------------------------------------------------------------|
| <b>Cochrane Library</b> | <p>#1 ((duration or length or timing or time or months or reduce* or alterat*) near/3 (dose* or therapy* or treatment* or medication* or DAPT or "dual anti-platelet")):ti,ab OR (de-escalat* or "prescribing practice*" or short-term or abbreviat*):ti,ab OR (duration or length or timing or time or month*):ti<br/>                     #2 ((antiplatelet or anti-platelet) near/3 (dual or combination) near/3 (intervention* or therap*)):ti,ab or ((Aspirin or "Acetylsalicylic acid") and (clopidogrel or plavix or prasugrel or effient or ticagrelor or brilinta or "P2Y12 inhibitor*")):ti,ab or (DAPT):ti,ab<br/>                     #3 ("percutaneous coronary" near/3 (interven* or revascular*)):ti,ab or (PCI):ti,ab or ((balloon or stent*) near/3 angioplast*):ti,ab or (("drug coated" or "drug eluting" or "drug releasing") near/3 stent*):ti,ab<br/>                     #4 #1 and #2 and #3</p>                                                                                                                                                                                                                                                                                                                                                                                                                                                                                                                                                                                                                                                                                                                                                                                                                                                                                                                                                                                                                                                                                                                                                                                                                                           |
| <b>Ovid Embase</b>      | <p>1 exp percutaneous coronary intervention/<br/>                     2 exp drug eluting stent/<br/>                     3 (percutaneous coronary adj3 (interven* or revascular*)).tw,kf.<br/>                     4 PCI.ti,ab.<br/>                     5 ((balloon or stent*) adj3 angioplast*).tw,kf.<br/>                     6 ((drug coated or drug eluting or drug releasing) adj3 stent*).tw,kf.<br/>                     7 1 or 2 or 3 or 4 or 5 or 6<br/>                     8 exp dual antiplatelet therapy/<br/>                     9 ((antiplatelet or anti-platelet) adj3 (dual or combination) adj3 (intervention* or therap*)).tw,kf.<br/>                     10 DAPT.ti,ab.<br/>                     11 ((Aspirin or Acetylsalicylic acid) and (clopidogrel or plavix or prasugrel or effient or ticagrelor or brilinta or P2Y12 inhibitor*)).tw,kf.<br/>                     12 8 or 9 or 10 or 11<br/>                     13 7 and 12<br/>                     14 exp randomized controlled trial/<br/>                     15 exp single blind procedure/<br/>                     16 double blind procedure/<br/>                     17 crossover procedure/<br/>                     18 (random* or factorial* or crossover* or placebo* or assign* or allocat* or volunteer*).tw,kf.<br/>                     19 (cross adj1 over).tw,kf.<br/>                     20 ((double or triple or single) adj1 (mask* or blind*)).tw,kf.<br/>                     21 14 or 15 or 16 or 17 or 18 or 19 or 20<br/>                     22 13 and 21<br/>                     23 treatment duration/<br/>                     24 ((duration or length or timing or time or months or reduce* or alterat*) adj3 (dose* or therap* or treatment* or medication* or DAPT or dual anti-platelet)).tw,kf.<br/>                     25 (duration or length or timing or time or month*).ti.<br/>                     26 (de-escalat* or prescribing practice* or short-term or abbreviat*).tw,kf.<br/>                     27 prescribing practice/<br/>                     28 23 or 24 or 25 or 26 or 27<br/>                     29 22 and 28</p> |
| <b>Ovid MEDLINE</b>     | <p>1 exp Percutaneous Coronary Intervention/<br/>                     2 exp drug eluting stent/<br/>                     3 (percutaneous coronary adj3 (interven* or revascular*)).tw,kf.<br/>                     4 PCI.ti,ab.<br/>                     5 ((balloon or stent*) adj3 angioplast*).tw,kf.<br/>                     6 ((drug coated or drug eluting or drug releasing) adj3 stent*).tw,kf.</p>                                                                                                                                                                                                                                                                                                                                                                                                                                                                                                                                                                                                                                                                                                                                                                                                                                                                                                                                                                                                                                                                                                                                                                                                                                                                                                                                                                                                                                                                                                                                                                                                                                                                                                                                                      |

|                                       |                                                                                                                                                                                                                                                                                                                                                                                                                                                                                                                                                                                                                                                                                                                                                                                                                                                                                                                                                                                                                                                                                                                                                                                                                                                                                                                                                                                                                                                                                                                          |
|---------------------------------------|--------------------------------------------------------------------------------------------------------------------------------------------------------------------------------------------------------------------------------------------------------------------------------------------------------------------------------------------------------------------------------------------------------------------------------------------------------------------------------------------------------------------------------------------------------------------------------------------------------------------------------------------------------------------------------------------------------------------------------------------------------------------------------------------------------------------------------------------------------------------------------------------------------------------------------------------------------------------------------------------------------------------------------------------------------------------------------------------------------------------------------------------------------------------------------------------------------------------------------------------------------------------------------------------------------------------------------------------------------------------------------------------------------------------------------------------------------------------------------------------------------------------------|
|                                       | <p>7 1 or 2 or 3 or 4 or 5 or 6</p> <p>8 ((antiplatelet or anti-platelet) adj3 (dual or combination) adj3 (intervention* or therap*).tw,kf.</p> <p>9 DAPT.ti,ab.</p> <p>10 ((Aspirin or Acetylsalicylic acid) and (clopidogrel or plavix or prasugrel or effient or ticagrelor or brilinta or P2Y12 inhibitor*).tw,kf.</p> <p>11 8 or 9 or 10</p> <p>12 7 and 11 5188</p> <p>13 "duration of therapy"/</p> <p>14 ((duration or length or timing or time or months or reduce* or alterat*) adj3 (dose* or therap* or treatment* or medication* or DAPT or dual anti-platelet)).tw,kf.</p> <p>15 (duration or length or timing or time or month*).ti.</p> <p>16 (de-escalat* or prescribing practice* or short-term or abbreviat*).tw,kf.</p> <p>17 13 or 14 or 15 or 16</p> <p>18 12 and 17</p> <p>19 exp randomized controlled trial/</p> <p>20 single-blind method/</p> <p>21 Double-Blind Method/</p> <p>22 cross-over studies/</p> <p>23 (random* or factorial* or crossover* or placebo* or assign* or allocat* or volunteer*).tw,kf.</p> <p>24 (cross adj1 over).tw,kf.</p> <p>25 ((double or triple or single) adj1 (mask* or blind*).tw,kf.</p> <p>26 19 or 20 or 21 or 22 or 23 or 24 or 25</p> <p>27 18 and 26</p>                                                                                                                                                                                                                                                                                              |
| <b>PubMed</b>                         | <p>(((((random*[Title/Abstract] OR factorial*[Title/Abstract] OR crossover*[Title/Abstract] OR placebo*[Title/Abstract] OR assign*[Title/Abstract] OR allocat*[Title/Abstract] OR volunteer*[Title/Abstract])) OR (double mask*[Title/Abstract] OR double blind*[Title/Abstract] OR single mask*[Title/Abstract] OR single blind*[Title/Abstract] OR triple blind*[Title/Abstract] OR triple mask*[Title/Abstract] OR cross over[Title/Abstract])) OR (randomized controlled trial[MeSH Terms])) AND (((de-escalat*[Title/Abstract] OR prescribing practice*[Title/Abstract] OR short-term[Title/Abstract] OR abbreviat*[Title/Abstract] OR duration[Title/Abstract] OR length[Title/Abstract] OR timing[Title/Abstract] OR time[Title/Abstract] OR month*[Title/Abstract]) AND (((Aspirin[Title/Abstract] OR Acetylsalicylic acid[Title/Abstract]) AND (clopidogrel[Title/Abstract] OR plavix[Title/Abstract] OR prasugrel[Title/Abstract] OR effient[Title/Abstract] OR ticagrelor[Title/Abstract] OR brilinta[Title/Abstract] OR P2Y12 inhibitor*[Title/Abstract]))) OR (DAPT[Title/Abstract] OR dual antiplatelet[Title/Abstract] OR dual anti-platelet[Title/Abstract]))) AND (percutaneous coronary interven*[Title/Abstract] OR percutaneous coronary revascular*[Title/Abstract] OR PCI[Title/Abstract] OR balloon angioplast*[Title/Abstract] OR stent* angioplast*[Title/Abstract] OR drug coated stent*[Title/Abstract] OR drug eluting stent*[Title/Abstract] OR drug releasing stent*[Title/Abstract]))</p> |
| <b>Scopus</b>                         | <p>( TITLE-ABS-KEY ( ( antiplatelet OR anti-platelet ) W/3 ( dual OR combination ) W/3 ( intervention* OR therap* ) ) OR TITLE-ABS-KEY ( ( aspirin OR "Acetylsalicylic acid" ) AND ( clopidogrel OR plavix OR prasugrel OR effient OR ticagrelor OR brilinta OR "P2Y12 inhibitor*" ) ) OR TITLE-ABS-KEY ( dapt ) ) AND ( TITLE-ABS-KEY ( "percutaneous coronary" W/3 ( interven* OR revascular* ) ) OR TITLE-ABS-KEY ( pci ) OR TITLE-ABS-KEY ( ( balloon OR stent* ) W/3 angioplast* ) OR TITLE-ABS-KEY ( ( "drug coated" OR "drug eluting" OR "drug releasing" ) W/3 stent* ) ) AND ( TITLE-ABS-KEY ( ( duration OR length OR timing OR time OR months OR reduce* OR alterat* ) W/3 ( dose* OR therap* OR treatment* OR medication* OR dapt OR "dual anti-platelet" ) ) OR TITLE-ABS-KEY ( de-escalat* OR "prescribing practice*" OR short-term OR abbreviat* ) OR TITLE ( duration OR length OR timing OR time OR month* ) ) AND ( TITLE-ABS-KEY ( random* OR factorial* OR crossover* OR placebo* OR assign* OR allocat* OR volunteer* ) OR TITLE-ABS-KEY ( cross W/1 over ) OR TITLE-ABS-KEY ( ( double OR triple OR single ) W/1 ( mask* OR blind* ) ) )</p>                                                                                                                                                                                                                                                                                                                                                       |
| <b>Web of Science Core Collection</b> | <p>#1 TS=("percutaneous coronary" near/3 (interven* or revascular*)) or TS=(PCI) or TS=((balloon or stent*) near/3 angioplast*) or TS=(( "drug coated" or "drug eluting" or "drug releasing" ) near/3 stent*)</p> <p>#2 TS=((antiplatelet or anti-platelet) near/3 (dual or combination) near/3 (intervention* or therap*)) or TS=((Aspirin or "Acetylsalicylic acid") and (clopidogrel or plavix or prasugrel or effient or ticagrelor or brilinta or "P2Y12 inhibitor*)) or TS=(DAPT)</p>                                                                                                                                                                                                                                                                                                                                                                                                                                                                                                                                                                                                                                                                                                                                                                                                                                                                                                                                                                                                                              |



|  |                                                                                                                                                                                                                                                                                                                                                                                                                                                                                                                                               |
|--|-----------------------------------------------------------------------------------------------------------------------------------------------------------------------------------------------------------------------------------------------------------------------------------------------------------------------------------------------------------------------------------------------------------------------------------------------------------------------------------------------------------------------------------------------|
|  | <p>#3 TS=((duration or length or timing or time or months or reduce* or alterat*) near/3 (dose* or therap* or treatment* or medication* or DAPT or "dual anti-platelet")) OR TS=(de-escalat* or "prescribing practice*" or short-term or abbreviat*) OR TI=(duration or length or timing or time or month*)</p> <p>#4 TS=(random* or factorial* or crossover* or placebo* or assign* or allocat* or volunteer*) OR TS=(cross near/1 over) OR TS=((double or triple or single) near/1 (mask* or blind*))</p> <p>#5 #1 and #2 and #3 and #4</p> |
|--|-----------------------------------------------------------------------------------------------------------------------------------------------------------------------------------------------------------------------------------------------------------------------------------------------------------------------------------------------------------------------------------------------------------------------------------------------------------------------------------------------------------------------------------------------|

Supplemental Table S3. Baseline demographics of the selected trials

| Abbreviated/Standard, %       | HOST-IDEA | MASTER DAPT | TICO      | SMART CHOICE | TWILIGHT  | STOPDAPT-2 | REDUCE    | SMART-DATE |
|-------------------------------|-----------|-------------|-----------|--------------|-----------|------------|-----------|------------|
| Age, year, mean               | 65.6/65.9 | 76.1/76.0   | 61.0/61.0 | 64.6/64.4    | 65.2/65.1 | 68.1/69.1  | 61.0/60.0 | 62.0/62.2  |
| Female                        | 27.0/25.2 | 30.7/30.8   | 21.0/20.0 | 27.3/25.8    | 23.8/23.9 | 21.1/23.5  | 17.4/22.7 | 25.1/24.1  |
| BMI, kg/m <sup>2</sup> , mean | –         | 27.3/27.4   | 24.9/24.9 | 24.5/24.7    | 28.6/28.5 | 24.4/24.2  | –         | 24.3/24.5  |
| Diabetes mellitus             | 40.5/37.4 | 32.9/34.3   | 27.0/27.0 | 38.2/36.8    | 9.4/10.5  | 39.0/38.0  | 21.6/19.5 | 26.9/28.1  |
| Hypertension                  | 73.3/73.5 | 76.9/78.2   | 50.0/51.0 | 61.6/61.3    | 72.6/72.2 | 73.7/74.0  | 50.7/50.7 | 49.9/48.7  |
| Dyslipidemia                  | 81.2/80.1 | 67.2/68.1   | 61.0/60.0 | 45.1/45.5    | 60.7/60.2 | 74.4/74.8  | 46.3/44.9 | 24.2/25.2  |
| Current smoking               | –         | 10.0/8.1    | –         | 28.4/24.5    | 20.4/23.1 | 26.6/20.6  | 42.1/42.7 | 38.0/40.1  |
| Family history                | –         | –           | –         | –            | –         | –          | 35.0/36.0 | -          |
| Chronic kidney disease        | 11.0/10.5 | 18.2/20.1   | 19.0/22.0 | 2.9/3.5      | 16.8/16.7 | 5.5/5.6    | –         | 1.0/0.5    |
| Peripheral vascular disease   | 1.9/1.9   | –           | –         | –            | 6.9/6.8   | 6.4/6.6    | –         | -          |
| Heart failure                 | –         | –           | –         | –            | –         | 7.7/7.1    | –         | -          |
| Prior myocardial infarction   | 4.5/4.2   | 18.9/18.8   | 4.0/3.0   | 4.1/4.3      | 28.7/28.6 | 13.8/13.2  | –         | 2.3/1.7    |
| Prior PCI                     | 13.2/14.1 | 25.9/26.0   | –         | 11.5/11.8    | 42.3/42.0 | 33.5/35.1  | 11.7/9.8  | 4.9/3.9    |
| Prior CABG                    |           | 7.4/7.5     | 1.0/1.0   | –            | 10.2/9.8  | 1.1/2.8    | 2.8/2.8   |            |
| Prior stroke                  | 6.9/6.3   | –           | 4.0/4.0   | 6.6/6.8      | –         | –          | 1.5/2.0   | 3.9/4.4    |
| Prior bleeding                | –         | 7.2/6.8     | –         | –            | 0.9/0.9   | 1.3/1.9    | –         | -          |
| LVEF, %, mean                 | 58.2/58.6 | 53.5/53.0   | –         | 60.0/59.9    | –         | 59.8/59.7  | –         | 55.5/55.4  |
| Multivessel disease           | 51.8/51.7 | –           | 55.0/56.0 | 50.1/49.0    | 63.9/61.6 | –          | –         | 43.6/46.6  |
| <b>Clinical presentation</b>  |           |             |           |              |           |            |           |            |
| Silent ischemia               | 43.4/46.3 | 10.7/12.0   | –         | –            | 6.6/6.3   | –          | –         | -          |
| Stable angina                 |           | 40.2/40.6   | –         | 41.8/41.8    | 29.5/28.0 | 62.3/61.4  | –         | -          |
| Unstable angina               | 35.7/34.7 | 11.3/11.4   | 29.0/32.0 | 31.2/32.8    | 35.1/34.9 | 12.9/14.2  | 15.2/13.8 | 31.0/3.7   |
| NSTEMI                        | 20.9/19.0 | 25.9/24.4   | 35.0/32.0 | 16.0/15.4    | 28.8/30.8 | 5.4/6.6    | 35.6/41.0 | 31.5/31.4  |
| STEMI                         | –         | 11.9/11.6   | 36.0/36.0 | 11.0/10.0    | –         | 19.4/17.9  | 49.3/45.2 | 37.5/37.9  |

Supplemental Table S3. Baseline demographics of the selected trials (continued)

| Abbreviated/Standard, %       | GLOBAL LEADERS | IVUS-XPL  | SECURITY  | ISAR-SAFE | OPTIMIZE  | I-LOVE-IT 2 | RESET     | EXCELLENT |
|-------------------------------|----------------|-----------|-----------|-----------|-----------|-------------|-----------|-----------|
| Age, year, mean               | 64.9/64.8      | 63.0/64.0 | 64.9/69.5 | 67.2/67.2 | 61.3/61.9 | 60.4/60.0   | 62.4/62.4 | 63.0/62.4 |
| Female                        | 24.0/23.5      | 33.0/30.0 | 22.4/23.2 | 19.3/19.5 | 36.5/36.9 | 32.8/31.3   | 35.6/37.1 | 34.9/36.1 |
| BMI, kg/m <sup>2</sup> , mean | –              | 24.8/24.6 | –         | 27.2/27.5 | –         | 25.1/25.3   | 25.0/24.9 | 24.9/25.1 |
| Diabetes mellitus             | 24.3/23.7      | 36.0/37.0 | 30.4/31.4 | 24.8/24.2 | 35.4/35.3 | 23.2/22.1   | 29.8/28.8 | 37.7/38.6 |
| Hypertension                  | 72.5/72.3      | –         | 74.5/71.1 | 90.1/91.5 | 86.4/88.2 | 61.0/64.8   | 62.3/61.4 | 72.7/73.8 |
| Dyslipidemia                  | 63.3/65.3      | 68.0/65.0 | 65.4/60.8 | 87.5/87.4 | 63.2/63.7 | 25.3/23.4   | 57.7/59.9 | 75.2/76.3 |
| Current smoking               | 2.6/2.6        | 25.0/24.0 | 20.5/24.4 | 14.6/15.3 | 18.6/17.3 | 36.6/38.3   | 25.2/22.8 | 27.4/25.8 |
| Family history                | –              | –         | –         | –         | 41.3/42.8 | 6.3/5.1     | –         | –         |
| Chronic kidney disease        | 13.4/13.1      | –         | –         | –         | 7.4/5.8   | –           | –         | 0.8/1.2   |
| Peripheral vascular disease   | 6.7/7.9        | –         | –         | –         | 2.8/3.0   | 1.4/1.1     | –         | –         |
| Heart failure                 | –              | –         | –         | –         | 4.3/4.2   | –           | 11.3/11.8 | 0.6/0.7   |
| Prior myocardial infarction   | 22.9/23.6      | 5.0/4.0   | 21.2/20.1 | 25.9/24.5 | 34.6/34.8 | 17.2/15.8   | 1.8/1.6   | 6.5/3.7   |
| Prior PCI                     | 32.6/33.9      | 10.0/10.0 | 19.4/16.2 | –         | 20.9/19.1 | 8.5/6.5     | 3.5/3.0   | 9.3/8.6   |
| Prior CABG                    | –              | 3.0/2.0   | 5.6/5.4   | 7.7/7.5   | 7.1/8.2   | 0.4/0.4     | 0.2/0.6   | –         |
| Prior stroke                  | –              | –         | –         | –         | 2.5/2.5   | 9.2/9.5     | –         | 6.5/6.7   |
| Prior bleeding                | 0.7/0.6        | –         | –         | –         | 0.6/0.6   | –           | –         | –         |
| LVEF, %, mean                 | 55.1/55.3      | 62.3/63.1 | 56.3/56.6 | –         | –         | 60.8/60.3   | 64.2/63.9 | 61.0/61.6 |
| Multivessel disease           | –              | –         | 43.8/40.8 | –         | –         | –           | 43.1/42.9 | –         |
| <b>Clinical presentation</b>  |                |           |           |           |           |             |           |           |
| Silent ischemia               | –              | –         | –         | 10.9/11.3 | 8.6/9.2   | 3.0/4.0     | –         | 48.9/48.0 |
| Stable angina                 | 48.9/49.9      | 51.0/51.0 | 61.6/61.6 | 48.6/47.8 | 59.8/58.6 | 14.3/15.1   | 44.5/46.3 |           |
| Unstable angina               | 12.9/13.2      | 34.0/33.0 | 38.4/38.4 | 21.5/21.9 | –         | 58.0/56.5   | 40.8/39.9 | 48.5/48.4 |
| NSTEMI                        | 20.0/19.4      | 15/16     | –         | 10.4/10.1 | 5.4/5.4   | 13.4/13.7   | 14.7/13.8 |           |
| STEMI                         | 18.2/17.5      |           | –         | 7.9/8.3   | –         | 11.3/10.7   |           |           |

Abbreviations: BMI, body mass index; CABG, coronary artery bypass graft; LVEF, left ventricular ejection fraction; NSTEMI, non-ST-elevation myocardial infarction; PCI, percutaneous coronary intervention; STEMI, ST-elevation myocardial infarction

Supplemental Table S4. Definition of outcomes used in the trials

| <b>Trial</b>          | <b>Net Adverse Clinical Events</b>                                                                  | <b>Major Adverse Cardiovascular Events</b>                       | <b>Bleeding</b>                                |
|-----------------------|-----------------------------------------------------------------------------------------------------|------------------------------------------------------------------|------------------------------------------------|
| <b>HOST-IDEA</b>      | Cardiac death, target vessel MI, clinically driven TLR, stent thrombosis, BARC type 3 or 5 bleeding | N/A <sup>a</sup>                                                 | N/A <sup>a</sup>                               |
| <b>MASTER DAPT</b>    | MACE, BARC type 3 or 5 bleeding                                                                     | All-cause mortality, MI, stroke                                  | Major or nonmajor clinically relevant bleeding |
| <b>TICO</b>           | MACE, TIMI major bleeding                                                                           | All-cause mortality, MI, stent thrombosis, stroke, TVR           | TIMI major bleeding                            |
| <b>SMART-CHOICE</b>   | N/A <sup>a</sup>                                                                                    | All-cause mortality, MI, stroke                                  | BARC type 2-5 bleeding                         |
| <b>TWILIGHT</b>       | N/A <sup>a</sup>                                                                                    | All-cause mortality, MI, stroke                                  | BARC type 2, 3, or 5 bleeding                  |
| <b>STOPDAPT-2</b>     | Cardiac death, MI, stent thrombosis, stroke, TIMI minor or major bleeding                           | Cardiac death, MI, stent thrombosis, stroke                      | TIMI minor or major bleeding                   |
| <b>REDUCE</b>         | All-cause mortality, MI, stent thrombosis, stroke, TVR, BARC type 2, 3, or 5 bleeding               | N/A <sup>a</sup>                                                 | BARC 2, 3, or 4 bleeding                       |
| <b>SMART-DATE</b>     | N/A <sup>a</sup>                                                                                    | All-cause mortality, MI, stroke                                  | N/A <sup>a</sup>                               |
| <b>GLOBAL LEADERS</b> | N/A <sup>a</sup>                                                                                    | All-cause mortality, MI, stroke, urgent TVR                      | BARC type 3 or 5 bleeding                      |
| <b>IVUS-XPL</b>       | Cardiac death, MI, stroke, TIMI major bleeding                                                      | N/A <sup>a</sup>                                                 | N/A <sup>a</sup>                               |
| <b>SECURITY</b>       | Cardiac death, MI, stroke, definite or probable stent thrombosis, BARC type 3 or 5 bleeding         | Cardiac death, MI, stroke, definite or probable stent thrombosis | BARC type 3 or 5 bleeding                      |
| <b>ISAR-SAFE</b>      | All-cause mortality, MI, stent thrombosis, stroke, TIMI major bleeding                              | N/A <sup>a</sup>                                                 | N/A <sup>a</sup>                               |
| <b>OPTIMIZE</b>       | All-cause mortality, MI, stroke, major bleeding                                                     | N/A <sup>a</sup>                                                 | N/A <sup>a</sup>                               |
| <b>I-LOVE-IT 2</b>    | All-cause mortality, MI, stroke, BARC type 3-5 bleeding                                             | Cardiac death, target vessel MI, clinically indicated TLR        | N/A <sup>a</sup>                               |
| <b>RESET</b>          | Cardiac death, MI, stent thrombosis, ischemia-driven TVR, TIMI major bleeding                       | N/A <sup>a</sup>                                                 | TIMI minor or major bleeding                   |
| <b>EXCELLENT</b>      | N/A <sup>a</sup>                                                                                    | All-cause mortality, MI, stroke, revascularization               | N/A <sup>a</sup>                               |

<sup>a</sup>Not applicable because this outcome was not reported in subgroup of patients with diabetes mellitus

Abbreviations: BARC, Bleeding Academic Research Consortium; MI, myocardial infarction; TIMI, Thrombolysis In Myocardial Infarction; TLR, target lesion revascularization; TVR, target vessel revascularization

Supplemental Table S5. Risk of bias in the selected studies using the Cochrane Risk Assessment Tool

| <b>Trial</b>          | <b>Random Sequence Generation<br/>(Selection Bias)</b> | <b>Allocation Concealment<br/>(Selection Bias)</b> | <b>Blinding of Participants and Personnel<br/>(Performance Bias)</b> | <b>Blinding of Outcome Assessment<br/>(Detection Bias)</b> | <b>Incomplete Outcome Data<br/>(Attrition Bias)</b> | <b>Selective Reporting<br/>(Reporting Bias)</b> | <b>Other Bias</b> |
|-----------------------|--------------------------------------------------------|----------------------------------------------------|----------------------------------------------------------------------|------------------------------------------------------------|-----------------------------------------------------|-------------------------------------------------|-------------------|
| <b>HOST-IDEA</b>      | Low                                                    | Low                                                | High                                                                 | Low                                                        | Low                                                 | Low                                             | Unclear           |
| <b>MASTER DAPT</b>    | Low                                                    | Low                                                | Low                                                                  | Low                                                        | Low                                                 | Low                                             | Unclear           |
| <b>TICO</b>           | Low                                                    | Low                                                | High                                                                 | Low                                                        | Low                                                 | Low                                             | Unclear           |
| <b>SMART CHOICE</b>   | Low                                                    | Low                                                | High                                                                 | Low                                                        | Low                                                 | Low                                             | Unclear           |
| <b>TWILIGHT</b>       | Low                                                    | Low                                                | Low                                                                  | Low                                                        | Low                                                 | Low                                             | Unclear           |
| <b>STOPDAPT-2</b>     | Low                                                    | Unclear                                            | High                                                                 | Low                                                        | Low                                                 | Low                                             | Unclear           |
| <b>REDUCE</b>         | Low                                                    | Low                                                | High                                                                 | Low                                                        | Low                                                 | Low                                             | High              |
| <b>SMART-DATE</b>     | Low                                                    | Low                                                | High                                                                 | Low                                                        | Low                                                 | Low                                             | Unclear           |
| <b>GLOBAL LEADERS</b> | Low                                                    | Low                                                | Low                                                                  | Low                                                        | Low                                                 | Low                                             | Unclear           |
| <b>IVUS-XPL</b>       | Low                                                    | Low                                                | High                                                                 | Low                                                        | Low                                                 | Low                                             | High              |
| <b>SECURITY</b>       | Low                                                    | Low                                                | Unclear                                                              | Low                                                        | Low                                                 | Low                                             | Unclear           |
| <b>ISAR-SAFE</b>      | Low                                                    | Low                                                | Low                                                                  | Low                                                        | Low                                                 | Low                                             | Unclear           |
| <b>OPTIMIZE</b>       | Low                                                    | Low                                                | High                                                                 | Low                                                        | Low                                                 | Low                                             | Unclear           |
| <b>I-LOVE-IT 2</b>    | Low                                                    | Unclear                                            | Unclear                                                              | Unclear                                                    | Low                                                 | Low                                             | High              |
| <b>RESET</b>          | Low                                                    | Low                                                | High                                                                 | Unclear                                                    | Low                                                 | Low                                             | Unclear           |
| <b>EXCELLENT</b>      | Low                                                    | Low                                                | High                                                                 | Low                                                        | Low                                                 | Low                                             | High              |

Supplemental Table S6. Grading of Recommendations, Assessment, Development and Evaluations (GRADE) criteria for each outcome

| <b>Outcome</b>                        | <b>Trials</b> | <b>Risk of Bias</b> | <b>Imprecision</b> | <b>Inconsistency</b> | <b>Indirectness</b> | <b>Publication Bias</b> | <b>Certainty</b> |
|---------------------------------------|---------------|---------------------|--------------------|----------------------|---------------------|-------------------------|------------------|
| Net adverse clinical events           | 11            | Moderate            | Low                | Low                  | Low                 | Low                     | ⊕⊕⊕○             |
| Major adverse cardiovascular events   | 10            | Moderate            | Moderate           | Low                  | Low                 | Low                     | ⊕⊕⊕○             |
| Bleeding                              | 9             | Moderate            | Moderate           | Low                  | Low                 | Low                     | ⊕⊕⊕○             |
| Definite or probable stent thrombosis | 10            | Moderate            | Low                | Low                  | Low                 | Low                     | ⊕⊕⊕○             |

Supplemental Table S7. Heterogeneity assessment in network meta-analysis

| <b>Outcome</b>                               | <b><math>\tau^2</math></b> | <b>I<sup>2</sup></b> |
|----------------------------------------------|----------------------------|----------------------|
| <b>Net adverse clinical events</b>           | 0                          | 0%                   |
| <b>Major adverse cardiovascular events</b>   | 0.0490                     | 42.1%                |
| <b>Bleeding</b>                              | 0.0297                     | 14.6%                |
| <b>Definite or probable stent thrombosis</b> | 0                          | 0%                   |

Supplemental Table S8. Node-splitting analysis of inconsistency for each outcome

| <b>Outcome</b>                               | <b>Comparison</b>         | <b>K</b> | <b>Prop</b> | <b>NMA</b> | <b>Direct</b> | <b>Indirect</b> | <b>Difference</b> | <b>Z-value</b> | <b>P-value</b> |
|----------------------------------------------|---------------------------|----------|-------------|------------|---------------|-----------------|-------------------|----------------|----------------|
| <b>Net adverse clinical events</b>           | 12 months versus 1 month  | 1        | 0.57        | 0.0916     | 0.1360        | 0.0320          | 0.1040            | 0.30           | 0.7617         |
|                                              | 3 months versus 1 month   | 0        | 0           | -0.1278    | -             | -0.1278         | -                 | -              | -              |
|                                              | 6 months versus 1 month   | 1        | 0.76        | -0.0141    | -0.0390       | 0.0650          | -0.1040           | -0.30          | 0.7617         |
|                                              | 12 months versus 3 months | 5        | 1.00        | 0.2194     | 0.2194        | -               | -                 | -              | -              |
|                                              | 12 months versus 6 months | 4        | 0.67        | 0.1057     | 0.0710        | 0.1750          | -0.1040           | -0.30          | 0.7617         |
|                                              | 3 months versus 6 months  | 0        | 0           | -0.1137    | -             | -0.1137         | -                 | -              | -              |
| <b>Major adverse cardiovascular events</b>   | 12 months versus 1 month  | 2        | 0.75        | 0.0148     | 0.1047        | -0.2591         | 0.3638            | 0.89           | 0.3747         |
|                                              | 3 months versus 1 month   | 0        | 0           | -0.1776    | -             | -0.1776         | -                 | -              | -              |
|                                              | 6 months versus 1 month   | 1        | 0.50        | 0.1047     | -0.0761       | 0.2877          | -0.3638           | -0.89          | 0.3747         |
|                                              | 12 months versus 3 months | 3        | 1.00        | 0.1924     | 0.1924        | -               | -                 | -              | -              |
|                                              | 12 months versus 6 months | 4        | 0.74        | -0.0900    | -0.1831       | 0.1807          | -0.3638           | -0.89          | 0.3747         |
|                                              | 3 months versus 6 months  | 0        | 0           | -0.2823    | -             | -0.2823         | -                 | -              | -              |
| <b>Bleeding</b>                              | 12 months versus 1 month  | 2        | 0.91        | 0.4782     | 0.4368        | 0.8812          | -0.4444           | -0.46          | 0.6423         |
|                                              | 3 months versus 1 month   | 0        | 0           | 0.1456     | -             | 0.1456          | -                 | -              | -              |
|                                              | 6 months versus 1 month   | 1        | 0.93        | 0.2383     | 0.2674        | -0.1770         | 0.4444            | 0.46           | 0.6423         |
|                                              | 12 months versus 3 months | 5        | 1.00        | 0.3325     | 0.3325        | -               | -                 | -              | -              |
|                                              | 12 months versus 6 months | 1        | 0.16        | 0.2399     | 0.6139        | 0.1695          | 0.4444            | 0.46           | 0.6423         |
|                                              | 3 months versus 6 months  | 0        | 0           | -0.0927    | -             | -0.0927         | -                 | -              | -              |
| <b>Definite or probable stent thrombosis</b> | 12 months versus 1 month  | 2        | 1.00        | -0.1234    | -0.1234       | -               | -                 | -              | -              |
|                                              | 3 months versus 1 month   | 0        | 0           | -0.1779    | -             | -0.1779         | -                 | -              | -              |
|                                              | 6 months versus 1 month   | 0        | 0           | 0.5786     | -             | 0.5786          | -                 | -              | -              |
|                                              | 12 months versus 3 months | 5        | 1.00        | 0.0545     | 0.0545        | -               | -                 | -              | -              |
|                                              | 12 months versus 6 months | 3        | 1.00        | -0.7020    | -0.7020       | -               | -                 | -              | -              |
|                                              | 3 months versus 6 months  | 0        | 0           | -0.7565    | -             | -0.7565         | -                 | -              | -              |



Supplemental Table S9. Event rates of each outcome in the included trials

| <b>Outcome</b>                             | <b>Trial</b>   | <b>Shortened DAPT</b> | <b>Control DAPT</b> |
|--------------------------------------------|----------------|-----------------------|---------------------|
| <b>Net adverse clinical events</b>         | HOST-IDEA      | 4.7%                  | 7.1%                |
|                                            | MASTER DAPT    | 8.6%                  | 8.3%                |
|                                            | TICO           | 6.2%                  | 8.6%                |
|                                            | STOPDAPT-2     | 3.5%                  | 4.1%                |
|                                            | REDUCE         | 11.1%                 | 11.0%               |
|                                            | I-LOVE-IT 2    | 11.8%                 | 9.4%                |
|                                            | IVUS-XPL       | 2.0%                  | 3.1%                |
|                                            | SECURITY       | 3.9%                  | 5.4%                |
|                                            | ISAR-SAFE      | 1.8%                  | 2.5%                |
|                                            | OPTIMIZE       | 6.1%                  | 6.7%                |
|                                            | RESET          | 3.5%                  | 4.6%                |
| <b>Major adverse cardiovascular events</b> | MASTER DAPT    | 7.3%                  | 6.8%                |
|                                            | TICO           | 3.3%                  | 5.0%                |
|                                            | GLOBAL LEADERS | 10.1%                 | 12.6%               |
|                                            | SMART CHOICE   | 4.0%                  | 3.6%                |
|                                            | TWILIGHT       | 4.5%                  | 5.8%                |
|                                            | STOPDAPT-2     | 3.2%                  | 3.0%                |
|                                            | SMART-DATE     | 6.6%                  | 7.4%                |
|                                            | I-LOVE-IT 2    | 10.0%                 | 9.4%                |
|                                            | SECURITY       | 2.9%                  | 3.6%                |
| EXCELLENT                                  | 8.9%           | 2.8%                  |                     |
| <b>Bleeding</b>                            | MASTER DAPT    | 7.0%                  | 9.2%                |
|                                            | TICO           | 2.9%                  | 4.3%                |
|                                            | GLOBAL LEADERS | 2.6%                  | 3.0%                |
|                                            | SMART CHOICE   | 2.5%                  | 2.9%                |
|                                            | TWILIGHT       | 4.4%                  | 6.7%                |
|                                            | STOPDAPT-2     | 0.3%                  | 1.5%                |
|                                            | REDUCE         | 3.1%                  | 2.1%                |
|                                            | SECURITY       | 1.0%                  | 1.8%                |
| RESET                                      | 0.0%           | 0.7%                  |                     |
| <b>Stent thrombosis</b>                    | TICO           | 1.0%                  | 0.7%                |
|                                            | GLOBAL LEADERS | 2.5%                  | 2.4%                |
|                                            | TWILIGHT       | 0.5%                  | 0.7%                |
|                                            | STOPDAPT-2     | 0.5%                  | 0.1%                |
|                                            | REDUCE         | 0.6%                  | 1.4%                |
|                                            | I-LOVE-IT 2    | 0.5%                  | 0.5%                |
|                                            | SECURITY       | 0.5%                  | 0.4%                |
|                                            | OPTIMIZE       | 1.6%                  | 1.1%                |
|                                            | RESET          | 0.0%                  | 0.3%                |
| EXCELLENT                                  | 1.5%           | 0.0%                  |                     |

Abbreviations: DAPT, dual antiplatelet therapy

Supplemental Table S10. Sensitivity analysis of trials that reported major bleeding

|                                        |                  |                  |                 |                  |
|----------------------------------------|------------------|------------------|-----------------|------------------|
| <b>Bleeding</b><br>(5 trials included) | <b>1 month</b>   |                  |                 |                  |
|                                        | 1.36 (0.43-4.30) | <b>3 months</b>  |                 |                  |
|                                        | 1.18 (0.15-9.38) | 0.87 (0.11-6.58) | <b>6 months</b> |                  |
|                                        | 0.64 (0.27-1.52) | 0.47 (0.22-0.99) | 0.54 (0.8-3.55) | <b>12 months</b> |

The duration of dual antiplatelet therapy at the rightmost column serves as the reference group for the respective column.

Supplemental Table S11. Sensitivity analysis excluding the OPTIMIZE trial

|                                                                     |                  |                  |                   |                  |
|---------------------------------------------------------------------|------------------|------------------|-------------------|------------------|
| <b>Net adverse clinical events</b><br>(10 trials included)          | <b>1 month</b>   |                  |                   |                  |
|                                                                     | 1.20 (0.77-1.87) | <b>3 months</b>  |                   |                  |
|                                                                     | 1.01 (0.76-1.35) | 0.85 (0.55-1.30) | <b>6 months</b>   |                  |
|                                                                     | 0.91 (0.65-1.27) | 0.76 (0.57-1.02) | 0.90 (0.66-1.24)  | <b>12 months</b> |
| <b>Major adverse cardiovascular events</b><br>(10 trials included)  | <b>1 month</b>   |                  |                   |                  |
|                                                                     | 1.19 (0.71-2.00) | <b>3 months</b>  |                   |                  |
|                                                                     | 0.90 (0.60-1.35) | 0.75 (0.45-1.27) | <b>6 months</b>   |                  |
|                                                                     | 0.99 (0.70-1.39) | 0.82 (0.56-1.21) | 1.09 (0.77-1.55)  | <b>12 months</b> |
| <b>Bleeding</b><br>(9 trials included)                              | <b>1 month</b>   |                  |                   |                  |
|                                                                     | 0.86 (0.45-1.65) | <b>3 months</b>  |                   |                  |
|                                                                     | 0.79 (0.50-1.25) | 0.91 (0.42-1.96) | <b>6 months</b>   |                  |
|                                                                     | 0.62 (0.36-1.07) | 0.72 (0.51-0.99) | 0.79 (0.40-1.56)  | <b>12 months</b> |
| <b>Definite or probable stent thrombosis</b><br>(9 trials included) | <b>1 month</b>   |                  |                   |                  |
|                                                                     | 1.54 (0.59-4.02) | <b>3 months</b>  |                   |                  |
|                                                                     | 0.56 (0.10-3.13) | 0.36 (0.06-2.19) | <b>6 months</b>   |                  |
|                                                                     | 1.13 (0.65-1.98) | 0.73 (0.34-1.59) | 2.02 (0.40-10.24) | <b>12 months</b> |

The duration of dual antiplatelet therapy at the rightmost column serves as the reference group for the respective column.

Supplemental Table S12. Sensitivity analysis including trials that exclusively enrolled patients with acute coronary syndrome

|                                                                   |                  |                  |                  |                  |
|-------------------------------------------------------------------|------------------|------------------|------------------|------------------|
| <b>Net adverse clinical events</b><br>(3 trials included)         | <b>1 month</b>   |                  |                  |                  |
|                                                                   | 1.20 (0.62-2.33) | <b>3 months</b>  |                  |                  |
|                                                                   | -                | -                | <b>6 months</b>  |                  |
|                                                                   | 0.98 (0.57-1.68) | 0.82 (0.55-1.20) | -                | <b>12 months</b> |
| <b>Major adverse cardiovascular events</b><br>(3 trials included) | <b>1 month</b>   |                  |                  |                  |
|                                                                   | 1.86 (0.76-4.54) | <b>3 months</b>  |                  |                  |
|                                                                   | 1.38 (0.62-3.06) | 0.74 (0.32-1.73) | <b>6 months</b>  |                  |
|                                                                   | 1.24 (0.68-2.25) | 0.67 (0.34-1.29) | 0.89 (0.53-1.51) | <b>12 months</b> |

The duration of dual antiplatelet therapy at the rightmost column serves as the reference group for the respective column. For net adverse clinical events, pooled risk ratios associated with 6 months of dual antiplatelet therapy are not shown because of the absence of trials that included 6 months of dual antiplatelet therapy in their control group and reported major bleeding rates in men and women.

Supplemental Figure S1. Node-splitting analysis of inconsistency for each outcome

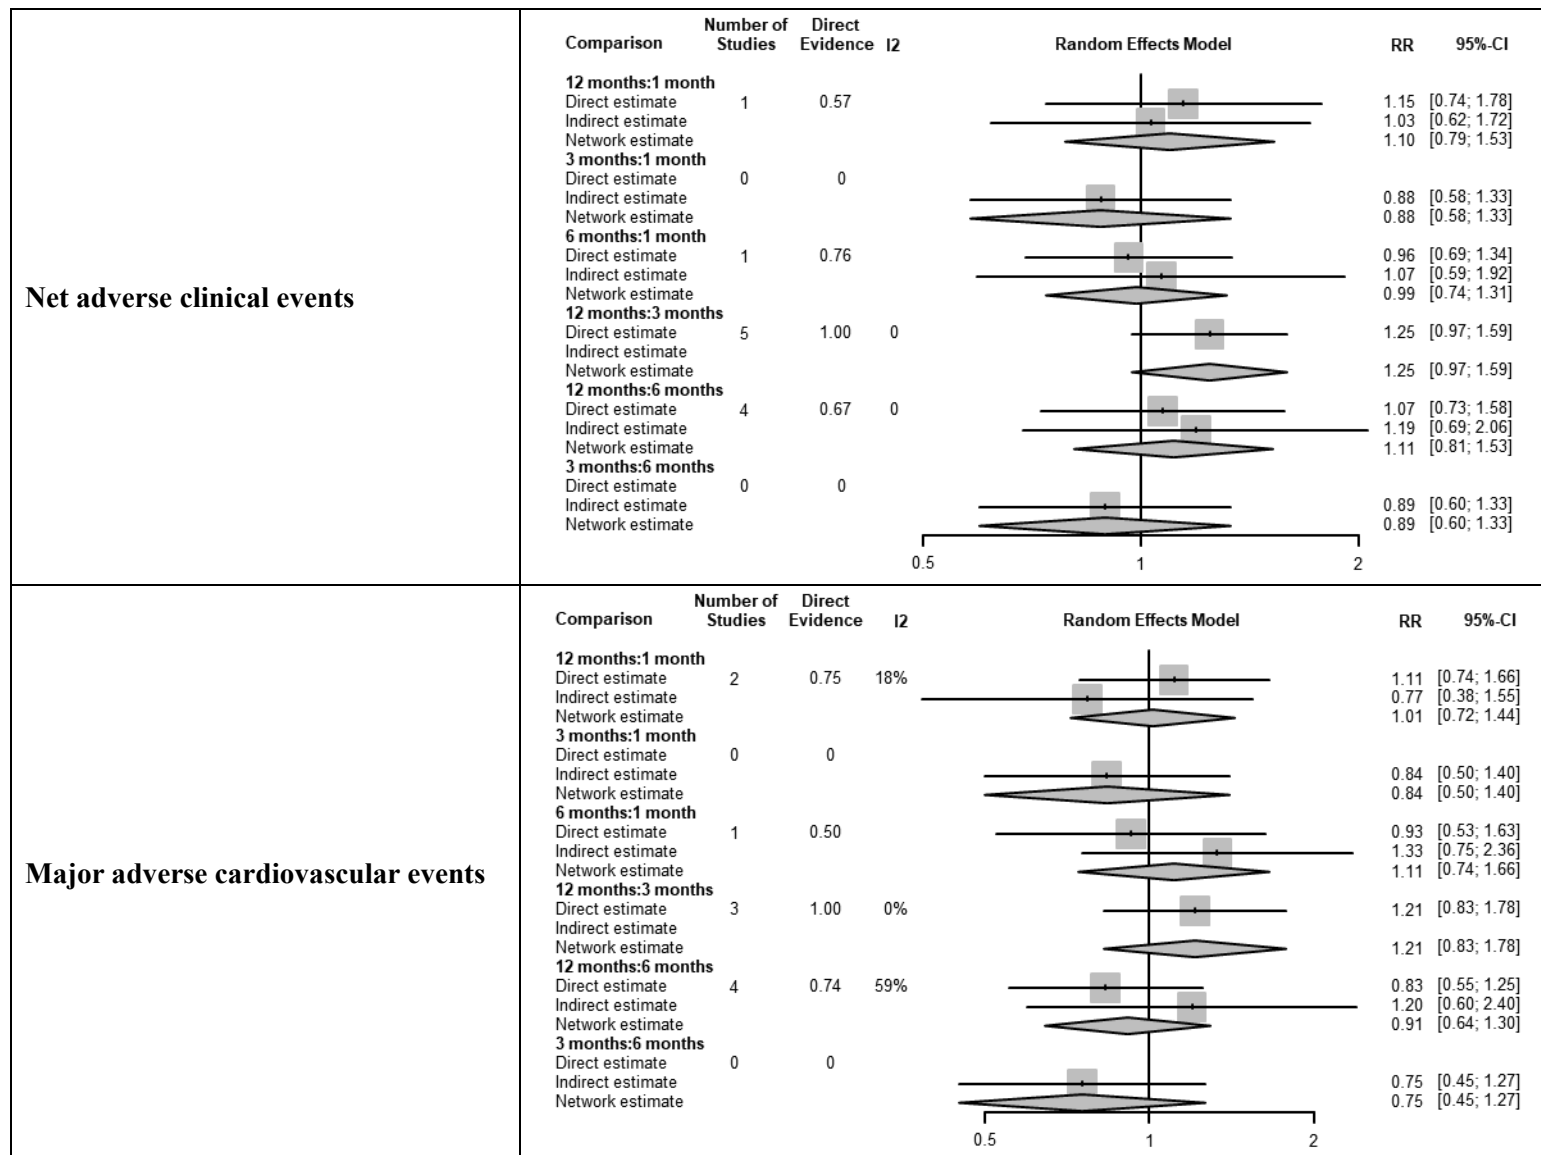

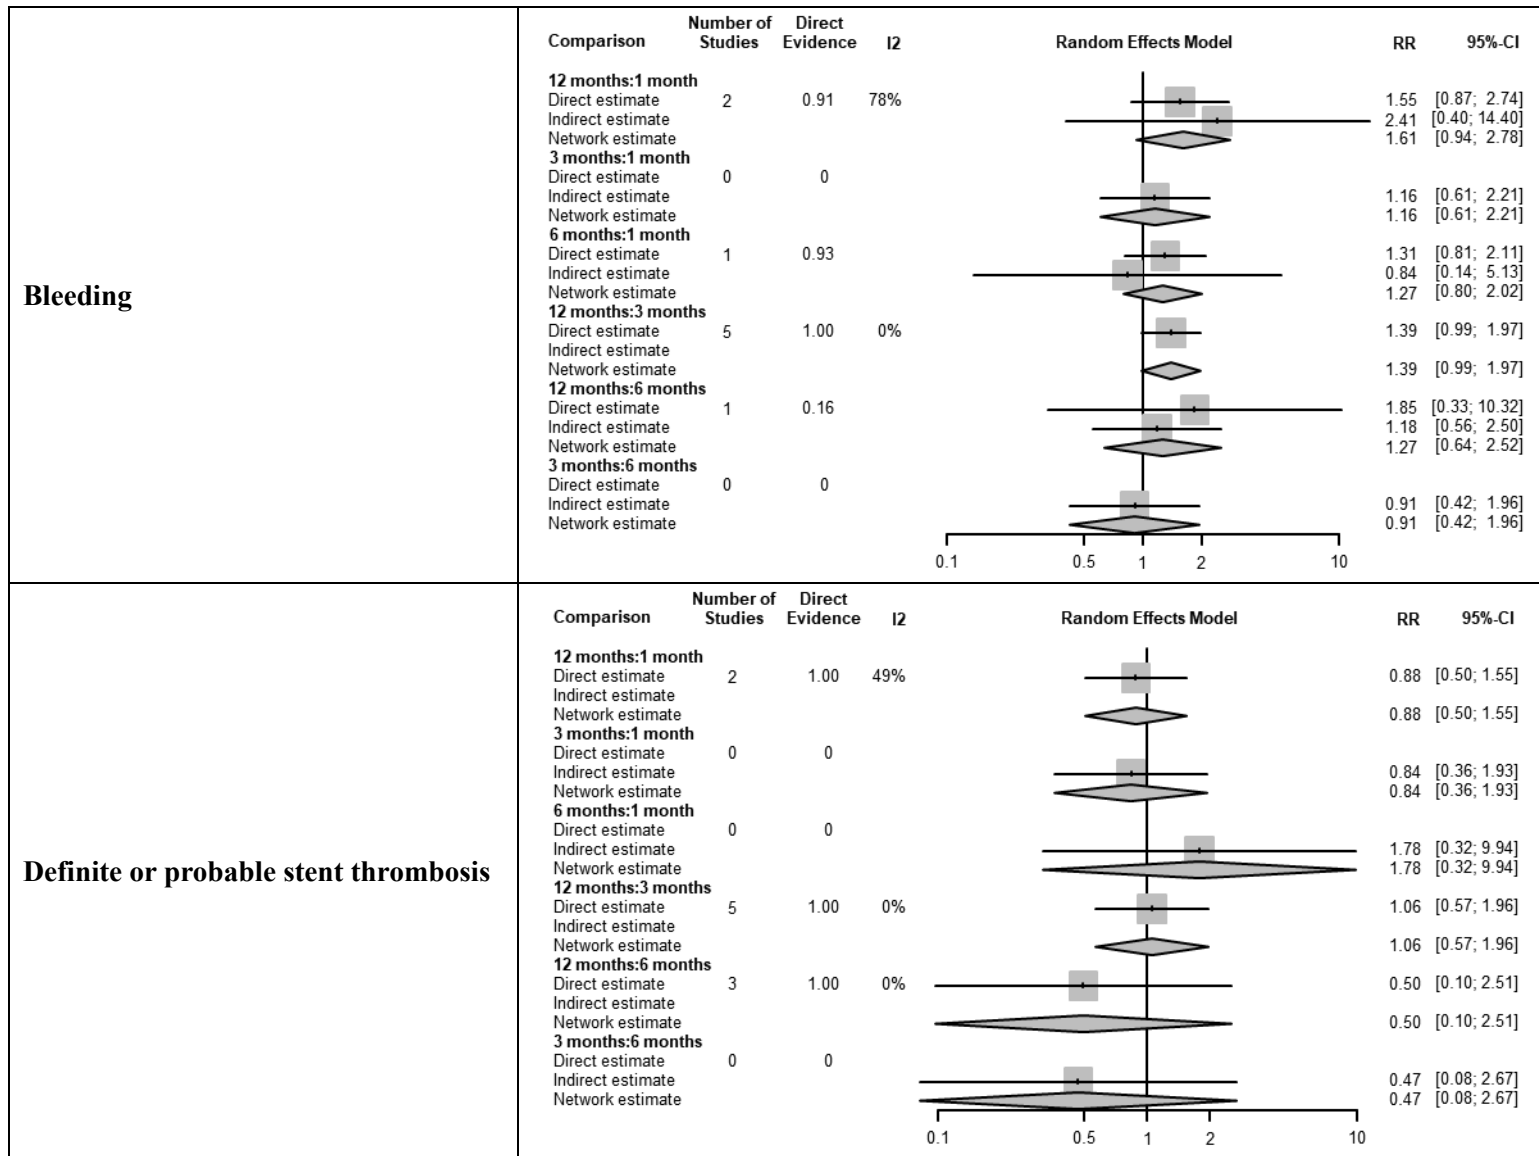

Supplement: mmc1.pdf [file mmc1.pdf]
